# Supplementary material for: Association Between Changes in Hemoglobin Concentration and Cardiovascular Risks and All‐Cause Mortality Among Young Women
Source: PubMed Central journal article supplement — J Am Heart Assoc. 2018 Aug 15;7(16):e008147. doi: 10.1161/JAHA.117.008147 (PMC6201397; doi:10.1161/jaha.117.008147), 2018-08-15
Supplement: JAH3-7-e008147-s001.pdf [file JAH3-7-e008147-s001.pdf]

# **Supplemental Material**

**Figure S1. Association of hemoglobin concentration (as a categorical variable) with cardiovascular risks and all-cause mortality after 10-year follow-up among young women.**

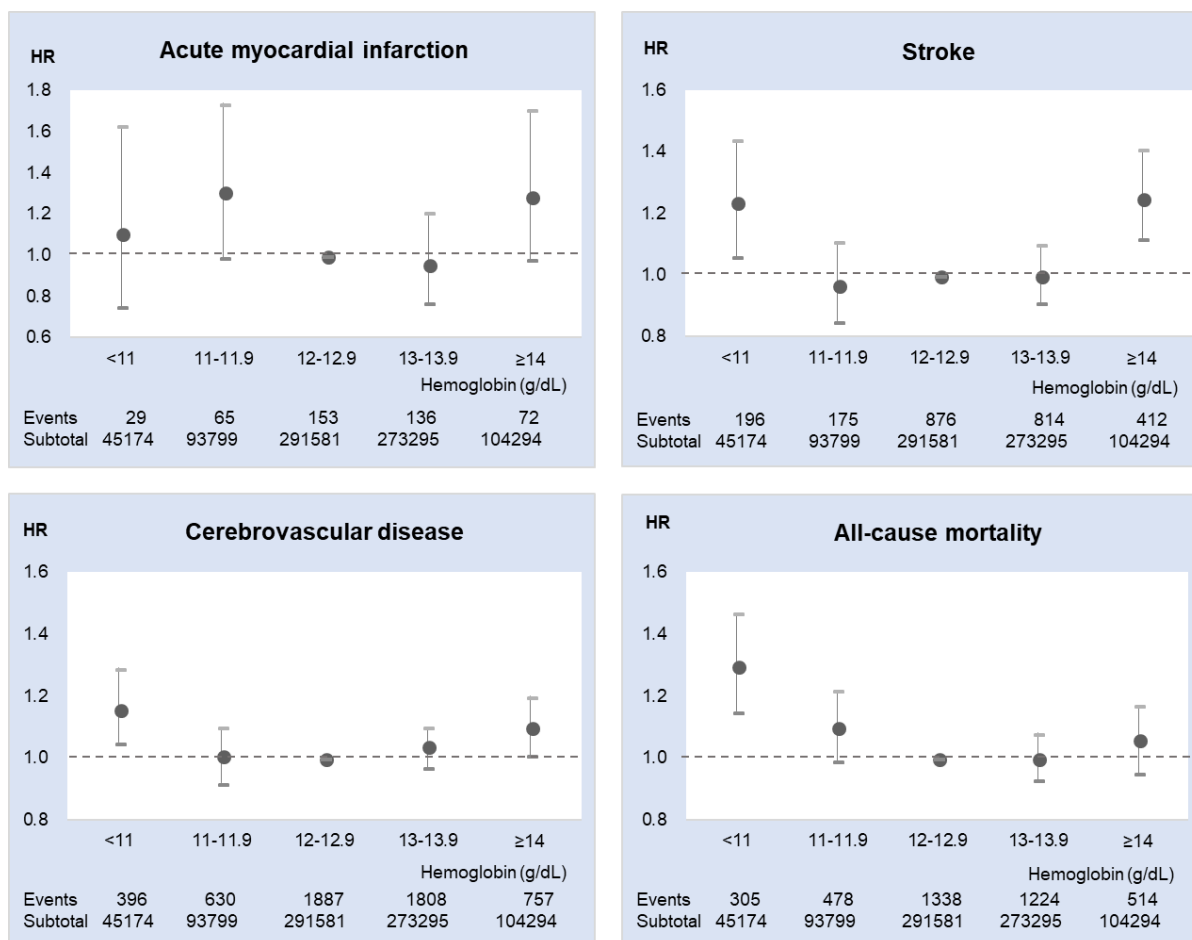

HR, Hazard ratio

Hazard ratio analyzed by Cox proportional hazards regression analysis adjusted for age, socioeconomic status, physical activity, smoking, alcohol, body mass index, blood pressure, fasting plasma glucose, total cholesterol, and Charlson comorbidity index (95% confidence interval).

**Table S1. Subgroup analysis of association between hemoglobin concentration and cardiovascular risks and all-cause mortality stratified by body mass index and the Charlson comorbidity index status.**

| <b>Hb concentration (g/dL)</b>             | <b>&lt;11.0</b> | <b>11-11.9</b> | <b>12-12.9</b> | <b>13-13.9</b> | <b>≥14.0</b> |
|--------------------------------------------|-----------------|----------------|----------------|----------------|--------------|
| <b>Risk of acute myocardial infarction</b> |                 |                |                |                |              |
| BMI (kg/m <sup>2</sup> ): <18.5 (N)        | 4,407           | 10,381         | 35,668         | 35,857         | 14,941       |
| Events (n)                                 | 5               | 5              | 11             | 11             | 8            |
| Adjusted HR                                | 3.18            | 1.50           | 1.00           | 1.05           | 1.84         |
| 95% CI                                     | 1.10-9.22       | 0.52-4.31      | reference      | 0.45-2.42      | 0.73-4.59    |
| BMI: 18.5-22.9 (N)                         | 23,087          | 50,412         | 155,934        | 141,501        | 51,102       |
| Events (n)                                 | 12              | 26             | 68             | 55             | 22           |
| Adjusted HR                                | 1.05            | 1.16           | 1.00           | 0.91           | 1.01         |
| 95% CI                                     | 0.57-1.95       | 0.74-1.82      | reference      | 0.64-1.31      | 0.62-1.64    |
| BMI: ≥23.0 (N)                             | 17,680          | 33,006         | 99,979         | 95,937         | 38,251       |
| Events (n)                                 | 12              | 34             | 74             | 70             | 42           |
| Adjusted HR                                | 0.84            | 1.38           | 1.00           | 0.98           | 1.41         |
| 95% CI                                     | 0.46-1.54       | 0.92-2.07      | reference      | 0.71-1.36      | 0.96-2.06    |
| CCI=0 (N)                                  | 21,039          | 42,994         | 135,661        | 128,946        | 49,417       |
| Events (n)                                 | 13              | 20             | 58             | 46             | 25           |
| Adjusted HR                                | 1.26            | 1.07           | 1.00           | 0.84           | 1.16         |
| 95% CI                                     | 0.69-2.31       | 0.64-1.77      | reference      | 0.57-1.24      | 0.72-1.86    |
| CCI≥1 (N)                                  | 24,135          | 50,805         | 155,920        | 144,349        | 54,877       |
| Events (n)                                 | 16              | 45             | 95             | 90             | 47           |
| Adjusted HR                                | 0.95            | 1.41           | 1.00           | 1.02           | 1.35         |
| 95% CI                                     | 0.56-1.62       | 0.99-2.02      | reference      | 0.77-1.37      | 0.95-1.92    |
| <b>Risk of stroke</b>                      |                 |                |                |                |              |
| BMI (kg/m <sup>2</sup> ): <18.5 (N)        | 4,407           | 10,381         | 35,668         | 35,857         | 14,941       |
| Events (n)                                 | 11              | 20             | 60             | 60             | 23           |
| Adjusted HR                                | 1.25            | 1.10           | 1.00           | 1.01           | 0.95         |
| 95% CI                                     | 0.65-2.37       | 0.66-1.83      | reference      | 0.71-1.44      | 0.59-1.54    |
| BMI: 18.5-22.9 (N)                         | 23,087          | 50,412         | 155,934        | 141,501        | 51,102       |
| Events (n)                                 | 78              | 132            | 389            | 327            | 145          |
| Adjusted HR                                | 1.15            | 1.02           | 1.00           | 0.93           | 1.11         |
| 95% CI                                     | 0.90-1.46       | 0.84-1.24      | reference      | 0.80-1.08      | 0.91-1.34    |
| BMI: ≥23.0 (N)                             | 17,680          | 33,006         | 99,979         | 95,937         | 38,251       |
| Events (n)                                 | 107             | 123            | 427            | 427            | 244          |
| Adjusted HR                                | 1.26            | 0.87           | 1.00           | 1.00           | 1.47         |
| 95% CI                                     | 1.02-1.56       | 0.71-1.07      | reference      | 0.88-1.15      | 1.14-1.57    |
| CCI=0 (N)                                  | 21,039          | 42,994         | 135,661        | 128,946        | 49,417       |
| Events (n)                                 | 79              | 111            | 306            | 285            | 154          |
| Adjusted HR                                | 1.38            | 1.12           | 1.00           | 0.96           | 1.29         |
| 95% CI                                     | 1.08-1.77       | 0.90-1.40      | reference      | 0.82-1.13      | 1.06-1.57    |
| CCI≥1 (N)                                  | 24,135          | 50,805         | 155,920        | 144,349        | 54,877       |
| Events (n)                                 | 117             | 164            | 570            | 529            | 258          |
| Adjusted HR                                | 1.13            | 0.86           | 1.00           | 0.97           | 1.17         |
| 95% CI                                     | 0.93-1.38       | 0.73-1.03      | reference      | 0.87-1.10      | 1.01-1.35    |
| <b>Risk of cerebrovascular disease</b>     |                 |                |                |                |              |
| BMI (kg/m <sup>2</sup> ): <18.5 (N)        | 4,407           | 10,381         | 35,668         | 35,857         | 14,941       |
| Events (n)                                 | 23              | 47             | 123            | 126            | 48           |
| Adjusted HR                                | 1.30            | 1.25           | 1.00           | 1.03           | 0.98         |
| 95% CI                                     | 0.84-2.01       | 0.90-1.74      | reference      | 0.80-1.32      | 0.70-1.37    |
| BMI: 18.5-22.9 (N)                         | 23,087          | 50,412         | 155,934        | 141,501        | 51,102       |
| Events (n)                                 | 151             | 294            | 840            | 740            | 277          |
| Adjusted HR                                | 1.05            | 1.04           | 1.00           | 0.99           | 1.02         |
| 95% CI                                     | 0.89-1.25       | 0.91-1.19      | reference      | 0.89-1.09      | 0.90-1.17    |
| BMI: ≥23.0 (N)                             | 17,680          | 33,006         | 99,979         | 95,937         | 38,251       |
| Events (n)                                 | 222             | 289            | 924            | 942            | 432          |
| Adjusted HR                                | 1.20            | 0.94           | 1.00           | 1.07           | 1.17         |

|                                     |           |           |           |           |           |
|-------------------------------------|-----------|-----------|-----------|-----------|-----------|
| 95% CI                              | 1.04-1.39 | 0.83-1.07 | reference | 0.98-1.17 | 1.04-1.31 |
| CCI=0 (N)                           | 21,039    | 42,994    | 135,661   | 128,946   | 49,417    |
| Events (n)                          | 148       | 204       | 643       | 609       | 248       |
| Adjusted HR                         | 1.25      | 0.98      | 1.00      | 0.99      | 1.05      |
| 95% CI                              | 1.05-1.49 | 0.84-1.15 | reference | 0.89-1.11 | 0.91-1.21 |
| CCI≥1 (N)                           | 24,135    | 50,805    | 155,920   | 144,349   | 54,877    |
| Events (n)                          | 248       | 426       | 1,244     | 1,199     | 509       |
| Adjusted HR                         | 1.12      | 1.02      | 1.00      | 1.05      | 1.11      |
| 95% CI                              | 0.98-1.28 | 0.92-1.14 | reference | 0.97-1.14 | 0.99-1.23 |
| <b>All-cause mortality</b>          |           |           |           |           |           |
| BMI (kg/m <sup>2</sup> ): <18.5 (N) | 4,407     | 10,381    | 35,668    | 35,857    | 14,941    |
| Events (n)                          | 28        | 50        | 145       | 134       | 55        |
| Adjusted HR                         | 1.30      | 1.21      | 1.00      | 0.97      | 0.97      |
| 95% CI                              | 0.87-1.95 | 0.89-1.65 | reference | 0.77-1.23 | 0.72-1.32 |
| BMI: 18.5-22.9 (N)                  | 23,087    | 50,412    | 155,934   | 141,501   | 51,102    |
| Events (n)                          | 147       | 228       | 647       | 583       | 214       |
| Adjusted HR                         | 1.40      | 1.08      | 1.00      | 1.01      | 1.04      |
| 95% CI                              | 1.17-1.67 | 0.93-1.25 | reference | 0.90-1.13 | 0.89-1.21 |
| BMI: ≥23.0 (N)                      | 17,680    | 33,006    | 99,979    | 95,937    | 38,251    |
| Events (n)                          | 130       | 200       | 546       | 527       | 245       |
| Adjusted HR                         | 1.25      | 1.11      | 1.00      | 1.01      | 1.11      |
| 95% CI                              | 1.03-1.51 | 0.94-1.30 | reference | 0.90-1.14 | 0.95-1.29 |
| CCI=0 (N)                           | 21,039    | 42,994    | 135,661   | 128,946   | 49,417    |
| Events (n)                          | 121       | 191       | 546       | 524       | 206       |
| Adjusted HR                         | 1.25      | 1.11      | 1.00      | 1.00      | 1.00      |
| 95% CI                              | 1.03-1.52 | 0.94-1.30 | reference | 0.89-1.13 | 0.85-1.17 |
| CCI≥1 (N)                           | 24,135    | 50,805    | 155,920   | 144,349   | 54,877    |
| Events (n)                          | 184       | 287       | 792       | 720       | 308       |
| Adjusted HR                         | 1.34      | 1.10      | 1.00      | 1.01      | 1.09      |
| 95% CI                              | 1.14-1.56 | 0.96-1.25 | reference | 0.91-1.11 | 0.95-1.24 |

HR, hazard ratio; CI, confidence interval; BMI, body mass index; CCI, Charlson Comorbidity index.

Hazard ratio calculated by Cox proportional hazards regression analysis adjusted for age, socioeconomic status, physical activity, smoking status, alcohol habit, body mass index, blood pressure, fasting serum glucose, total cholesterol

**Table S2. Sensitivity analysis of association between hemoglobin concentration and cardiovascular risks and all-cause mortality excluding women with cancer.**

| <b>Hb concentration (g/dL)</b> | <b>&lt;11.0</b> | <b>11.0-11.9</b> | <b>12.0-12.9</b> | <b>13.0-13.9</b> | <b>≥14.0</b> |
|--------------------------------|-----------------|------------------|------------------|------------------|--------------|
| Patients without cancer, N     | 44,040          | 91,876           | 286,110          | 268,503          | 102,504      |
| Risk of AMI, n                 | 27              | 65               | 147              | 130              | 72           |
| Adjusted HR                    | 1.09            | 1.34             | 1.00             | 0.96             | 1.31         |
| 95% CI                         | 0.73-1.63       | 0.99-1.79        | reference        | 0.76-1.22        | 0.99-1.75    |
| Risk of stroke, n              | 189             | 268              | 837              | 793              | 399          |
| Adjusted HR                    | 1.25            | 0.99             | 1.00             | 1.02             | 1.22         |
| 95% CI                         | 1.07-1.46       | 0.86-1.13        | reference        | 0.92-1.12        | 1.09-1.38    |
| Risk of CeVD, n                | 378             | 612              | 1,811            | 1,762            | 729          |
| Adjusted HR                    | 1.15            | 1.02             | 1.00             | 1.05             | 1.08         |
| 95% CI                         | 1.02-1.28       | 0.93-1.12        | reference        | 0.98-1.12        | 0.99-1.18    |
| All-cause mortality, n         | 20              | 433              | 1,223            | 1,150            | 481          |
| Adjusted HR                    | 1.30            | 1.10             | 1.00             | 1.01             | 1.07         |
| 95% CI                         | 1.14-1.48       | 0.99-1.23        | reference        | 0.93-1.10        | 0.97-1.19    |

Hb, hemoglobin; AMI, acute myocardial infarction; CeVD, cerebrovascular disease.

**Table S3. Sensitivity analysis of association between hemoglobin concentration and cardiovascular risks and all-cause mortality excluding women with chronic kidney disease.**

| <b>Hb concentration (g/dL)</b> | <b>&lt;11.0</b> | <b>11.0-11.9</b> | <b>12.0-12.9</b> | <b>13.0-13.9</b> | <b>≥14.0</b> |
|--------------------------------|-----------------|------------------|------------------|------------------|--------------|
| Patients without CKD, N        | 45,023          | 93,617           | 291,114          | 272,934          | 104,128      |
| Risk of AMI, n                 | 29              | 65               | 153              | 134              | 72           |
| Adjusted HR                    | 1.11            | 1.32             | 1.00             | 0.95             | 1.29         |
| 95% CI                         | 0.76-1.64       | 0.99-1.75        | reference        | 0.76-1.19        | 0.98-1.71    |
| Risk of stroke, n              | 195             | 274              | 874              | 812              | 411          |
| Adjusted HR                    | 1.24            | 0.97             | 1.00             | 1.00             | 1.21         |
| 95% CI                         | 1.06-1.44       | 0.85-1.11        | reference        | 0.91-1.10        | 1.08-1.36    |
| Risk of CeVD, n                | 395             | 628              | 1,882            | 1,805            | 755          |
| Adjusted HR                    | 1.17            | 1.01             | 1.00             | 1.04             | 1.08         |
| 95% CI                         | 1.05-1.30       | 0.92-1.10        | reference        | 0.97-1.11        | 0.99-1.17    |
| All-cause mortality, n         | 301             | 472              | 1,334            | 1,243            | 514          |
| Adjusted HR                    | 1.29            | 1.09             | 1.00             | 1.01             | 1.06         |
| 95% CI                         | 1.14-1.46       | 0.99-1.21        | reference        | 0.93-1.09        | 0.96-1.17    |

Hb, hemoglobin; CKD, chronic kidney disease; AMI, acute myocardial infarction; CeVD, cerebrovascular disease.
